# Supplementary material
Source: PubMed Central journal article supplement (PMC2875811)
Supplement: en.2009-1155_1.pdf [file en.2009-1155_1.pdf]

Supplemental Fig. 1

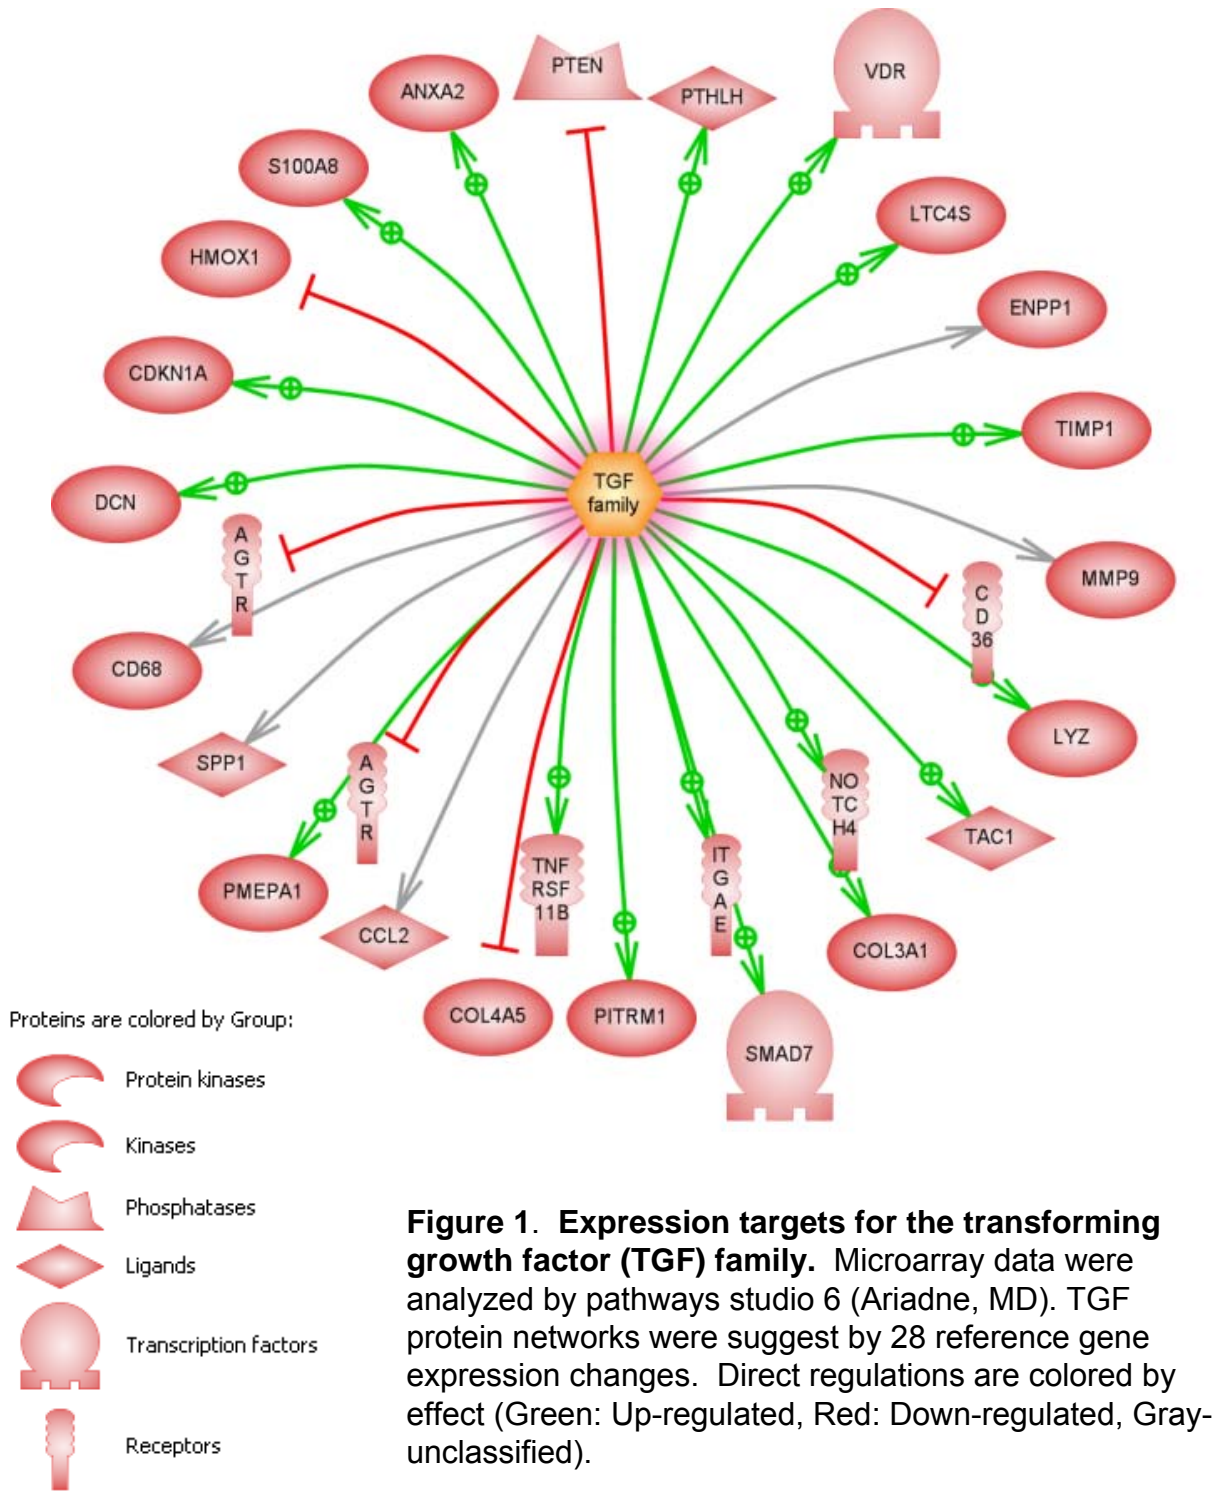

Supplemental Fig. 2

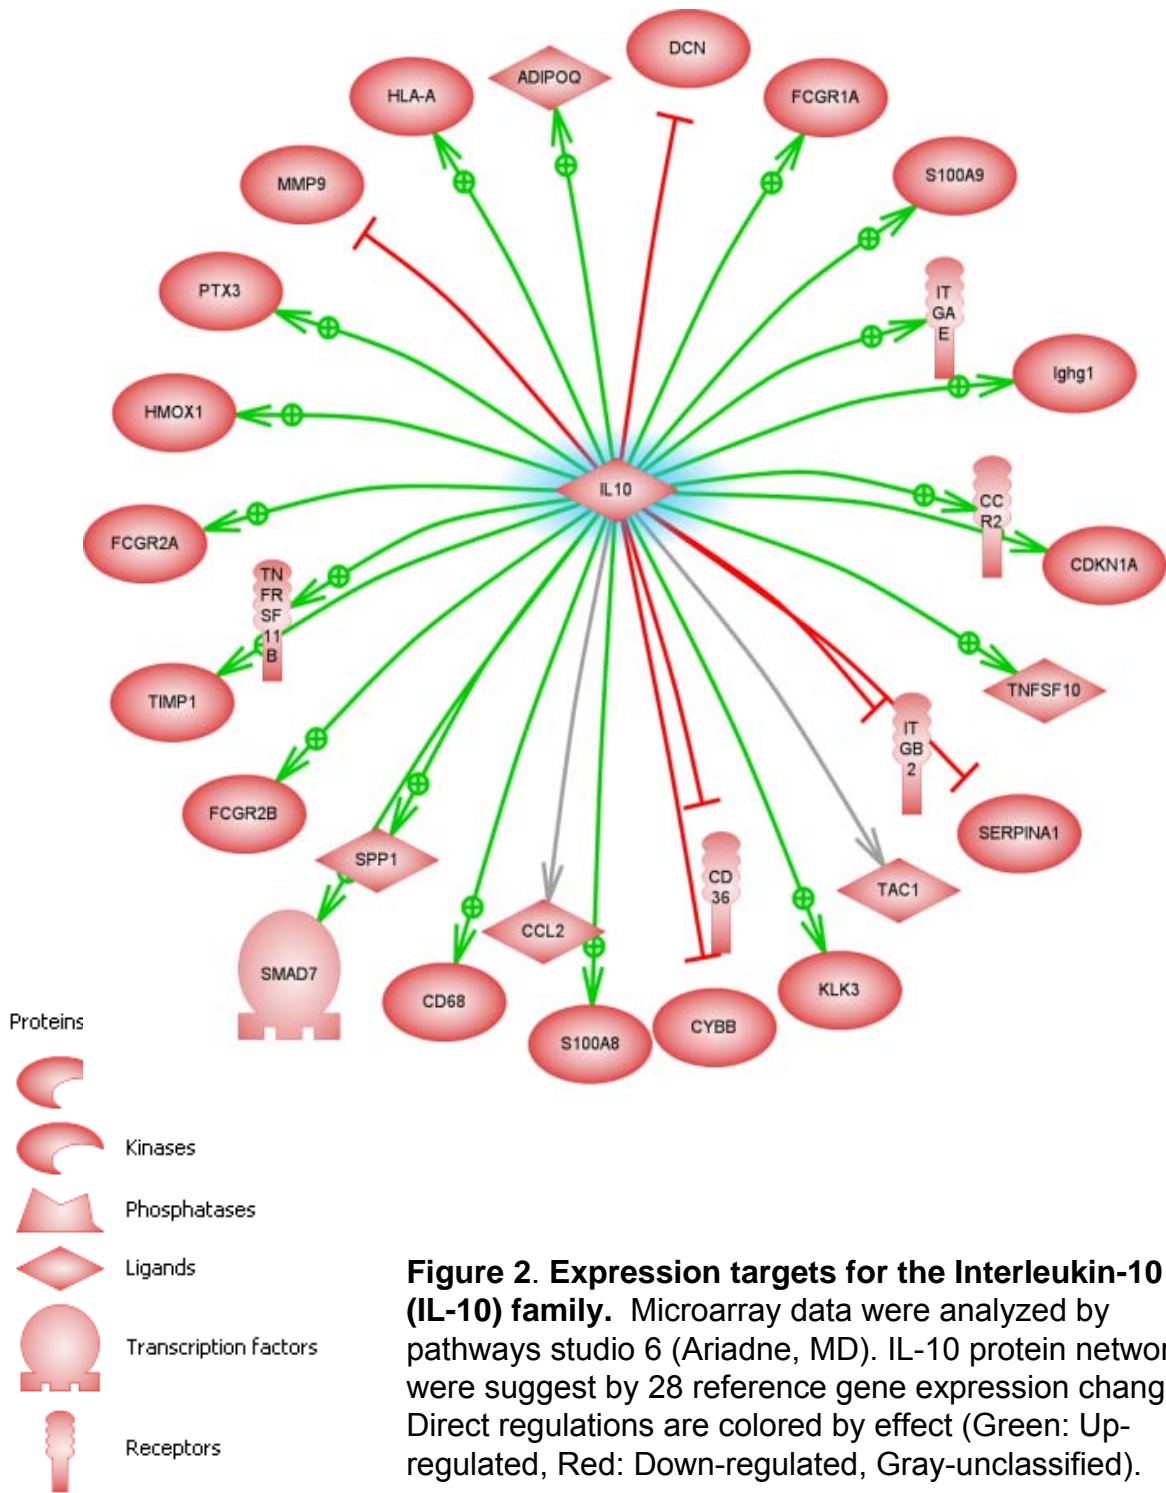

**Figure 2. Expression targets for the Interleukin-10 (IL-10) family.** Microarray data were analyzed by pathways studio 6 (Ariadne, MD). IL-10 protein networks were suggested by 28 reference gene expression changes. Direct regulations are colored by effect (Green: Up-regulated, Red: Down-regulated, Gray-unclassified).

Supplemental Fig. 3

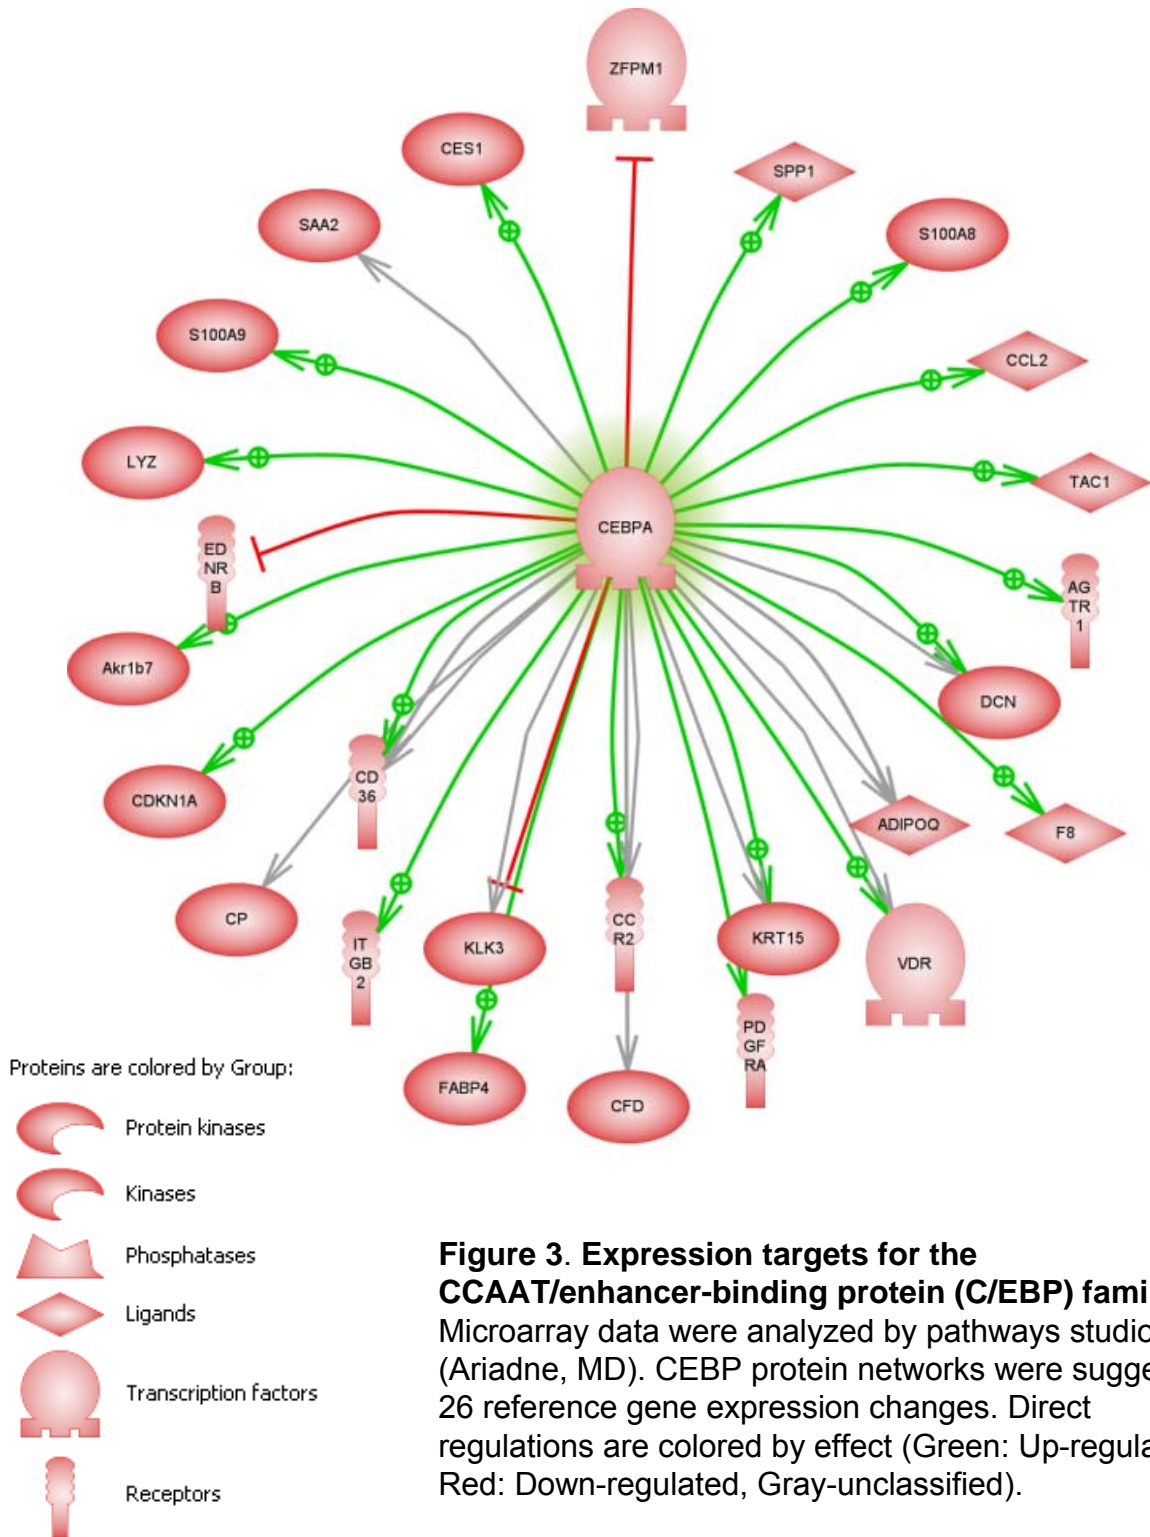

**Figure 3. Expression targets for the CCAAT/enhancer-binding protein (C/EBP) family.** Microarray data were analyzed by pathways studio 6 (Ariadne, MD). CEBP protein networks were suggested by 26 reference gene expression changes. Direct regulations are colored by effect (Green: Up-regulated, Red: Down-regulated, Gray-unclassified).

**Supplemental Table 1. Expression Targets of the TGF family**

| <b>Gene</b> | <b>Fold change</b> | <b>Description</b>                                     | <b>Entrez Gene ID</b>        |
|-------------|--------------------|--------------------------------------------------------|------------------------------|
| S100A8      | 6.58               | S100 calcium binding protein A8                        | 6279, 20201, 116547          |
| SPP1        | 2.46               | secreted phosphoprotein 1                              | 6696, 20750, 25353           |
| ANXA2       | 2.29               | annexin A2                                             | 302, 12306, 56611            |
| TNFRSF11B   | 2.11               | tumor necrosis factor receptor superfamily, member 11b | 4982, 18383, 25341           |
| AGTR2       | 1.92               | angiotensin II receptor, type 2                        | 186, 11609, 24182            |
| PITRM1      | 1.89               | pitrilysin metallopeptidase 1                          | 10531, 69617, 307081         |
| SMAD7       | 1.88               | SMAD, mothers against DPP 6/7                          |                              |
| CD36        | 1.86               | CD36 molecule (thrombospondin receptor)                | 12491, 29184, 499985, 685953 |
| AGTR1       | 1.79               | angiotensin II receptor, type 1a                       | 185, 11607, 24180            |
| LTC4S       | 1.76               | leukotriene C4 synthase                                | 4056, 17001, 114097          |
| HMOX1       | 1.74               | heme oxygenase (decycling) 1                           | 3162, 15368, 24451           |
| ITGAE       | 1.69               | integrin, alpha E                                      | 3682, 16407                  |
| CD68        | 1.66               | CD68 molecule                                          | 968, 12514, 287435           |
| COL4A5      | 1.64               | collagen, type IV, alpha 5 (Alport syndrome)           | 1287, 12830, 363457          |
| CCL2        | 1.63               | chemokine (C-C motif) ligand 12                        |                              |
| LYZ         | 1.6                | lysozyme (renal amyloidosis)                           | 4069, 17105, 17110, 25211    |
| DCN         | 1.57               | decorin                                                | 1634, 13179, 29139           |
| PTH1H       | 1.57               | parathyroid hormone-like hormone                       | 5744, 19227, 24695           |
| TIMP1       | 1.55               | TIMP metallopeptidase inhibitor 1                      | 7076, 21857, 116510          |
| ENPP1       | 1.52               | ectonucleotide pyrophosphatase/phosphodiesterase 1     | 5167, 18605, 85496           |
| MMP9        | 1.52               | matrix metallopeptidase 9                              | 4318, 17395, 81687           |
| TAC1        | -1.66              | tachykinin 1                                           |                              |
| VDR         | -1.69              | vitamin D (1,25- dihydroxyvitamin D3) receptor         | 7421, 22337, 24873           |
| PTEN        | -1.72              | phosphatase and tensin homolog                         | 5728, 19211, 50557           |
| NOTCH4      | -1.77              | Notch homolog 4 (Drosophila)                           |                              |
| COL3A1      | -1.82              | procollagen, type III, alpha 1                         | 1281, 12825, 84032           |
| PMEPA1      | -1.99              | prostate transmembrane protein, androgen induced 1     | 56937, 65112, 311676         |
| CDKN1A      | -2.11              | cyclin-dependent kinase inhibitor 1A (p21, Cip1)       |                              |

**Supplemental Table 2. Expression Targets of the IL-10 family**

| <b>Name</b> | <b>Fold change</b> | <b>Description</b>                                     | <b>Entrez Gene ID</b>        |
|-------------|--------------------|--------------------------------------------------------|------------------------------|
| S100A8      | 6.5756             | S100 calcium binding protein A8                        | 6279, 20201, 116547          |
| S100A9      | 5.4416             | S100 calcium binding protein A9                        | 6280, 20202, 94195           |
| SPP1        | 2.4631             | secreted phosphoprotein 1 (osteopontin)                | 6696, 20750, 25353           |
| TNFRSF11B   | 2.1111             | tumor necrosis factor receptor superfamily, member 11b | 4982, 18383, 25341           |
| CCL2        | 2.0349             | chemokine (C-C motif) ligand 12                        |                              |
| ITGB2       | 1.9885             | integrin beta 2                                        | 3689, 16414, 309684          |
| TNFSF10     | 1.9414             | tumor necrosis factor (ligand) superfamily, member 10  |                              |
| FCGR1A      | 1.9337             | Fc fragment of IgG, high affinity Ia, receptor (CD64)  | 2209, 14129, 295279          |
| SMAD7       | 1.8844             | SMAD, mothers against DPP 6/7                          |                              |
| CD36        | 1.8591             | CD36 molecule (thrombospondin receptor)                | 12491, 29184, 499985, 685953 |
| CCR2        | 1.7982             | chemokine (C-C motif) receptor 2                       |                              |
| FCGR2A      | 1.796              | Fc fragment of IgG, low affinity IIa, receptor (CD32)  | 2212, 14131, 116591          |
| HMOX1       | 1.74               | heme oxygenase (decycling) 1                           | 3162, 15368, 24451           |
| CYBB        | 1.7162             | cytochrome b-245, beta polypeptide                     | 1536, 13058, 66021           |
| ITGAE       | 1.687              | integrin, alpha E (antigen CD103, alpha polypeptide)   | 3682, 16407                  |
| CD68        | 1.66               | CD68 molecule                                          | 968, 12514, 287435           |
| FCGR2B      | 1.6513             | Fc fragment of IgG, low affinity IIb, receptor (CD32)  | 2213, 14130, 289211          |
| PTX3        | 1.6431             | pentraxin-related gene, rapidly induced by IL-1 beta   | 5806, 19288, 689388          |
| DCN         | 1.57               | decorin                                                | 1634, 13179, 29139           |
| Ighg1       | 1.5621             | immunoglobulin heavy constant gamma 1 (G1m marker)     | 16017                        |
| TIMP1       | 1.5458             | TIMP metalloproteinase inhibitor 1                     | 7076, 21857, 116510          |
| ADIPOQ      | 1.5385             | adiponectin, C1Q and collagen domain containing        | 9370, 11450, 246253          |
| MMP9        | 1.52               | matrix metalloproteinase 9                             | 4318, 17395, 81687           |
| HLA-A       | -1.585             | major histocompatibility complex, class I, A           |                              |
| KLK3        | -1.6322            | kallikrein-related peptidase 3                         | 354, 16617, 16619, 408242    |
| TAC1        | -1.6589            | tachykinin 1                                           |                              |
| SERPINA1    | -1.6731            | serpin peptidase inhibitor, clade A                    | 20702, 20703, 20704, 24648   |
| CDKN1A      | -2.11              | cyclin-dependent kinase inhibitor 1A (p21, Cip1)       |                              |

**Supplemental Table 3. Expression targets of the CCAAT/enhancer-binding protein (C/EBP) family**

| <b>Name</b> | <b>Fold change</b> | <b>Description</b>                                             | <b>Entrez Gene ID</b>        |
|-------------|--------------------|----------------------------------------------------------------|------------------------------|
| S100A8      | 6.5756             | S100 calcium binding protein A8                                | 6279, 20201, 116547          |
| S100A9      | 5.4416             | S100 calcium binding protein A9                                | 6280, 20202, 94195           |
| CES1        | 2.7993             | carboxylesterase 1 (monocyte/macrophage serine esterase 1)     | 1066, 104158                 |
| SPP1        | 2.4631             | secreted phosphoprotein 1 (osteopontin)                        | 6696, 20750, 25353           |
| FABP4       | 2.2407             | fatty acid binding protein 4, adipocyte                        | 2167, 11770, 79451           |
| CFD         | 2.1464             | complement factor D (adipsin)                                  | 1675, 11537, 54249           |
| ITGB2       | 1.9885             | integrin beta 2                                                | 3689, 16414, 309684          |
| CD36        | 1.8591             | CD36 molecule (thrombospondin receptor)                        | 12491, 29184, 499985, 685953 |
| CCR2        | 1.7982             | chemokine (C-C motif) receptor 2                               |                              |
| AGTR1       | 1.7869             | angiotensin II receptor, type 1a                               | 185, 11607, 24180            |
| EDNRB       | 1.6629             | endothelin receptor type B                                     |                              |
| CCL2        | 1.6349             | chemokine (C-C motif) ligand 12                                |                              |
| LYZ         | 1.6                | lysozyme (renal amyloidosis)                                   | 4069, 17105, 17110, 25211    |
| PDGFRA      | 1.5972             | platelet derived growth factor receptor, alpha polypeptide     |                              |
| DCN         | 1.569              | decorin                                                        | 1634, 13179, 29139           |
| ADIPOQ      | 1.5385             | adiponectin, C1Q and collagen domain containing                | 9370, 11450, 246253          |
| SAA2        | 1.5057             | Serum amyloid A2                                               | 6289, 20210                  |
| ZFPM1       | -1.5351            | zinc finger protein, multitype 1                               | 161882, 22761                |
| F8          | -1.5616            | coagulation factor VIII, procoagulant component (hemophilia A) | 2157, 14069, 302470          |
| CP          | -1.576             | ceruloplasmin (ferroxidase)                                    | 1356, 12870, 24268           |
| Akr1b7      | -1.583             | aldo-keto reductase family 1, member B7                        | 11997                        |
| TAC1        | -1.6589            | tachykinin 1                                                   |                              |
| KLK3        | -1.6834            | kallikrein-related peptidase 3                                 | 354, 16617, 16619, 408242    |
| VDR         | -1.69              | vitamin D (1,25- dihydroxyvitamin D3) receptor                 | 7421, 22337, 24873           |
| CDKN1A      | -2.11              | cyclin-dependent kinase inhibitor 1A (p21, Cip1)               |                              |
| KRT15       | -2.3889            | keratin 15                                                     | 3866, 16665, 287700          |

**Supplemental Table 4. Confirmation of microarray data by real-time PCR.**

The samples collected for the microarray analysis were subjected to real-time PCR analysis. Randomly selected genes were chosen from Supplemental Tables 1, 2 and 3. The primers were designed to amplify a product with a size of 150 -250 bases and real-time PCR performed as described in the *Materials and Methods*. Expression of each mRNA was standardized against GAPDH as a housekeeping gene and analyzed by the  $2^{-\Delta\Delta CT}$  method .

| Gene name | Real-time PCR Primers                                                          | Microarray fold-change | Real-time fold-change |
|-----------|--------------------------------------------------------------------------------|------------------------|-----------------------|
| AGTR2     | F 5'-ACTGGCACCAATGAGTCCGCC-3'<br>R 5'-AGGTTGCCAGAGAGGGAGGG-3'                  | 1.9                    | 1.81                  |
| CD36      | F 5'-AGGGTAGGGGTTTTCTACTGAGGACT-3'<br>R 5'-TGTTTTCTACGTGGCCCGTTCT-3'           | 1.86                   | 2.66                  |
| Enpp1     | F 5'-CAGCTTAATCTGACCACAGAAGATGT-3'<br>R 5'-TGTAAGACGCCAGAGGGGCA-3'             | 1.52                   | 1.40                  |
| Ltc4s     | F 5'-AGGGCTTTCCACGTGTCGCC-3'<br>R 5'-CTGAGCGCGGTATCCCTGG-3'                    | 1.76                   | 1.06                  |
| Spp       | F 5'-TCCCCAACGGCCGAGGTGAT-3'<br>R 5'-GCTCAGAAGCTGGGCAACAGGG-3'                 | 2.46                   | 2.30                  |
| Tac1      | F 5'-AAATCCTCGTGGCCGTGGCG-3'<br>R 5'-GGCTTGGGTCTTCGGGCGAT-3'                   | -1.66                  | -1.3                  |
| Cybb      | F 5'-AGCACTGCACACCGCCATCC-3'<br>R 5'-CACGGCCACATACAGGCCCC-3'                   | 1.7                    | 1.05                  |
| HMOX1     | F 5'-AGGAGCTGCACCGAAGGGCT-3'<br>R 5'-GTGGGCCACCAGCAGCTCAG-3'                   | 1.74                   | 1.62                  |
| Cp        | F 5'-CTCACCAAGCAGGGCCTGGG-3'<br>R 5'-GCCCAAGTGCTCGTCTTCTTCGG-3'                | -1.54                  | -1.32                 |
| S100A8    | F 5'- GAA CTG GAG AAG GCC TTG AG -3'<br>R 5'- TCT TGT AGA GGG CAT GGT GA -3'   | 6.57                   | 3.93                  |
| S100A9    | F 5' - ACA TCA TGG AGG ACC TGG AC -3'<br>R 5' - GAT CAA CTT TGC CAT CAG CA -3' | 5.44                   | 5.27                  |
